# Supplementary material for: Chemical-guided SHAPE sequencing (cgSHAPE-seq) informs the binding site of RNA-degrading chimeras targeting SARS-CoV-2 5’ untranslated region
Source: Springer Nature journal article supplement (doi:10.1038/s41467-024-55608-w), 2025-01-08
Supplement: MOESM4 [file 41467_2024_55608_MOESM4_ESM.xlsx]

## Sheet: Figure 2b
			Lowercases indicate primer binding site in amplicon sequencing
			NA: not applicable
			nucleotide	Sequence	ΔΔMutation rate [(C30-FAI - DMSO) - (FAI-N3 - DMSO)]	SD	ΔMutation rate (FAI-N3 - DMSO)
			6	a	NA	NA	NA
			7	g	NA	NA	NA
			8	g	NA	NA	NA
			9	u	NA	NA	NA
			10	u	NA	NA	NA
			11	u	NA	NA	NA
			12	a	NA	NA	NA
			13	u	NA	NA	NA
			14	a	NA	NA	NA
			15	c	NA	NA	NA
			16	c	NA	NA	NA
			17	u	NA	NA	NA
			18	u	NA	NA	NA
			19	c	NA	NA	NA
			20	c	NA	NA	NA
			21	c	NA	NA	NA
			22	a	NA	NA	NA
			23	g	NA	NA	NA
			24	g	NA	NA	NA
			25	u	NA	NA	NA
			26	a	NA	NA	NA
			27	a	NA	NA	NA
			28	c	NA	NA	NA
			29	A	-0.0007	0.000707	0.001
			30	A	0.0624	0.018535	-0.006
			31	A	0.0057	0.011386	-0.0029
			32	C	0.0316	0.016128	-0.0133
			33	C	-0.0662	0.008276	0.0244
			34	A	0.0566	0.007159	0.0091
			35	A	0.0678	0.013939	-0.0152
			36	C	0.0851	0.018535	0.0168
			37	C	-0.0383	0.007001	0.0225
			38	A	0.0343	0.004968	0.0025
			39	A	0.1416	0.006546	0.0031
			40	C	0.0931	0.005522	0.0013
			41	U	0.0869	0.010837	0.0105
			42	U	0.154	0.013744	0.045
			43	U	0.079	0.010622	-0.0046
			44	C	0.0448	0.012028	0.002
			45	G	0.0215	0.01549	-0.0025
			46	A	0.0937	0.008862	-0.011
			47	U	0.0193	0.007783	-0.0128
			48	C	0.0369	0.007366	0.0232
			49	U	-0.0016	0.009548	0.0002
			50	C	0.0095	0.013793	0.0115
			51	U	0.1547	0.02335	-0.0167
			52	U	0.0243	0.013652	-0.0039
			53	G	0.1221	0.01967	-0.0207
			54	U	0.0001	0.011317	-0.0145
			55	A	0.0289	0.009621	0.0067
			56	G	-0.0028	0.010397	0.0063
			57	A	0.0216	0.009904	0.0059
			58	U	0.0254	0.008987	-0.0047
			59	C	-0.0049	0.012235	0.0006
			60	U	0.0075	0.010469	0.003
			61	G	0.3562	0.019633	-0.0433
			62	U	0.2071	0.015023	-0.0185
			63	U	0.0311	0.009694	0.0148
			64	C	0.083	0.013238	0.0416
			65	U	0.0175	0.01259	-0.0007
			66	C	-0.0111	0.010466	-0.0065
			67	U	0.0315	0.008281	-0.0114
			68	A	0.0154	0.008773	-0.0007
			69	A	0.0032	0.007993	-0.0059
			70	A	0.0361	0.009626	-0.0029
			71	C	0.026	0.012804	-0.0009
			72	G	0.0261	0.010259	0.0321
			73	A	0.0006	0.00481	-0.0058
			74	A	0.0342	0.009061	0.0013
			75	C	0.0055	0.026028	0.0347
			76	U	0.1381	0.019461	-0.0008
			77	U	0.0761	0.016347	-0.0037
			78	U	0.1854	0.009701	0.0011
			79	A	0.0562	0.013515	-0.0261
			80	A	0.306	0.014009	-0.0083
			81	A	0.0609	0.008786	0.001
			82	A	0.1868	0.00886	0.0015
			83	U	0.0414	0.008987	0.0056
			84	C	-0.0129	0.010466	-0.0088
			85	U	0.0451	0.012735	-0.017
			86	G	0.1929	0.021513	-0.0598
			87	U	0.0076	0.0116	-0.0211
			88	G	0.0245	0.008987	0.0008
			89	U	0.0185	0.010469	0.0005
			90	G	-0.0153	0.007425	0.0008
			91	G	0.0602	0.021786	-0.0308
			92	C	0.055	0.016624	-0.0088
			93	U	0.0149	0.011176	-0.0076
			94	G	0.1111	0.020587	0.0435
			95	U	0.0401	0.013018	0.0039
			96	C	-0.0703	0.0087	0.0155
			97	A	0.1158	0.009296	-0.0048
			98	C	0.0338	0.013086	-0.0148
			99	U	0.0112	0.011741	-0.0126
			100	C	-0.0221	0.016125	-0.0035
			101	G	0.0356	0.014641	-0.0253
			102	G	0.0523	0.026241	-0.0449
			103	C	0.0461	0.015562	-0.001
			104	U	0.0333	0.008705	-0.0019
			105	G	0.0679	0.017263	-0.0327
			106	C	0.0755	0.021079	-0.0178
			107	G	0.1143	0.025183	-0.0429
			108	U	-0.0007	0.009266	0.005
			109	G	0.0344	0.022138	-0.0328
			110	C	0.0513	0.020304	-0.0312
			111	U	0.0439	0.016415	-0.0162
			112	U	0.0309	0.01408	-0.003
			113	A	0.0417	0.008853	0.0011
			114	G	0.1192	0.02547	-0.0204
			115	U	0.0222	0.008846	-0.0088
			116	G	0.0383	0.016976	-0.0191
			117	C	0.0748	0.027586	-0.0624
			118	A	0.0404	0.009485	-0.0149
			119	C	0.0478	0.019948	-0.0326
			120	U	0.042	0.010756	-0.0259
			121	C	-0.0406	0.010536	0.0094
			122	A	0.0828	0.01048	-0.0153
			123	C	0.0348	0.02129	-0.0106
			124	G	0.0497	0.023341	0.0014
			125	C	0.0307	0.017824	-0.0079
			126	A	0.0126	0.012024	-0.0144
			127	G	0.0714	0.023555	-0.0042
			128	U	0.0063	0.008983	0.0027
			129	A	0.0741	0.005441	0.0053
			130	U	0.0444	0.005749	-0.0048
			131	A	0.1747	0.00735	-0.0019
			132	A	0.0249	0.012804	-0.0361
			133	U	0.1318	0.011769	-0.0138
			134	U	0.0207	0.00927	-0.0017
			135	A	0.0348	0.008496	-0.0008
			136	A	0.3442	0.009021	0.0066
			137	U	0.0269	0.007998	-0.0069
			138	A	0.0246	0.007218	0.0004
			139	A	0.0733	0.012317	-0.0122
			140	C	0.1837	0.008301	0.0068
			141	U	0.0653	0.00921	-0.002
			142	A	0.0472	0.007159	0.0002
			143	A	0.1168	0.005769	-0.0028
			144	U	0.1728	0.007128	-0.005
			145	U	0.2053	0.006774	0.0098
			146	A	0.1266	0.009513	0.0131
			147	C	0.0347	0.008705	0.005
			148	U	0.0056	0.007638	-0.0103
			149	G	0.6015	0.01528	-0.0076
			150	U	0.0547	0.010971	-0.0173
			151	C	-0.0497	0.012233	0.0277
			152	G	0.0404	0.016483	-0.0055
			153	U	0.0365	0.010825	-0.0085
			154	U	0.0151	0.008631	-0.0062
			155	G	-0.0238	0.009688	0.0092
			156	A	0.0149	0.009762	0.0012
			157	C	0.0931	0.024262	-0.0217
			158	A	0.0146	0.014359	-0.0115
			159	G	-0.0121	0.020297	-0.0241
			160	G	-0.0265	0.011315	0.0126
			161	A	0.0116	0.010045	-0.0122
			162	C	0.0491	0.01217	-0.0068
			163	A	0.0401	0.009061	-0.0035
			164	C	0.1203	0.028862	-0.0367
			165	G	0.0124	0.018248	-0.0058
			166	A	0.0244	0.013086	-0.023
			167	G	0.0078	0.011317	-0.0045
			168	U	0.0058	0.006721	0.0056
			169	A	0.0223	0.004046	0.0008
			170	A	0.0542	0.006389	-0.0047
			171	C	-0.0057	0.008486	-0.0026
			172	U	0.0125	0.009762	-0.0139
			173	C	-0.0453	0.010607	0.0245
			174	G	1.6102	0.02648	0.0611
			175	U	0.024	0.014573	-0.0349
			176	C	-0.0074	0.010749	-0.0019
			177	U	0.0146	0.006935	-0.0078
			178	A	0.0083	0.006224	-0.0014
			179	U	0.0166	0.006794	-0.0041
			180	C	-0.029	0.0058	0.0086
			181	U	0.0204	0.011249	-0.0027
			182	U	0.01	0.010893	-0.0081
			183	C	0.0023	0.010752	-0.0028
			184	U	0.0164	0.011741	-0.0049
			185	G	0.125	0.024617	-0.0484
			186	C	0.0474	0.026241	-0.0001
			187	A	0.1609	0.015438	0.0226
			188	G	0.0123	0.013014	-0.0052
			189	G	0.0474	0.016552	-0.0832
			190	C	0.0015	0.008841	-0.0073
			191	U	0.0142	0.010045	-0.0158
			192	G	0.0673	0.022283	-0.0375
			193	C	0.0214	0.014573	-0.0326
			194	U	0.0176	0.009621	0.0012
			195	U	0.026	0.008705	-0.0192
			196	A	0.0227	0.008207	0.0039
			197	C	0.0918	0.021011	-0.0753
			198	G	0.001	0.013438	-0.0297
			199	G	0.0372	0.017117	-0.0109
			200	U	0.0333	0.013652	-0.0006
			201	U	0.0242	0.008705	0.0165
			202	U	0.0003	0.006366	-0.0031
			203	C	-0.0265	0.00792	0.0075
			204	G	0.1459	0.013387	0.0112
			205	U	0.0618	0.013373	-0.0186
			206	C	-0.0298	0.01867	-0.0073
			207	C	0.0109	0.019945	-0.0515
			208	G	0.098	0.028293	-0.0697
			209	U	0.032	0.011673	-0.015
			210	G	0.0456	0.01719	-0.021
			211	U	0.073	0.01719	-0.0246
			212	U	0.0294	0.009976	-0.0119
			213	G	0.0745	0.019948	-0.0383
			214	C	0.0786	0.024121	-0.06
			215	A	0.0081	0.013438	0.004
			216	G	0.0743	0.025607	-0.0232
			217	C	0.0954	0.030345	-0.0387
			218	C	-0.0139	0.011597	0.001
			219	G	-0.0166	0.014214	0.0112
			220	A	0.1625	0.01023	0.0003
			221	U	0.0043	0.014004	0.0222
			222	C	0.0229	0.009479	0.027
			223	A	0.0318	0.007857	0.002
			224	U	0.0124	0.0087	0.0021
			225	C	-0.0024	0.012942	0.0021
			226	A	0.0143	0.012024	-0.0062
			227	G	0.0766	0.022	-0.0293
			228	C	0.0243	0.018321	0.0005
			229	A	0.0171	0.005381	-0.0008
			230	C	0.0028	0.004738	0.0064
			231	A	-0.0003	0.005445	-0.003
			232	U	0.0109	0.009338	-0.0155
			233	C	0	0.00969	0.005
			234	U	0.0125	0.010186	-0.0088
			235	A	0.0398	0.012243	0.0713
			236	G	0.0142	0.011034	-0.0153
			237	G	0.0443	0.010756	-0.0119
			238	U	-0.0037	0.009831	0.0017
			239	U	0.0174	0.00849	0.043
			240	U	0.002	0.0058	0.0013
			241	C	-0.0435	0.010182	0.0378
			242	G	0.0948	0.014368	0.0019
			243	U	0.0201	0.012238	0.0038
			244	C	0.016	0.018814	0.0183
			245	C	0.0174	0.022845	-0.045
			246	G	0.0672	0.022776	-0.0946
			247	G	0.0098	0.023835	-0.0552
			248	G	0.0916	0.02589	-0.0824
			249	U	0.0139	0.009055	-0.003
			250	G	0.0197	0.011459	-0.0089
			251	U	0.0155	0.008207	-0.0054
			252	G	-0.0661	0.012869	0.0393
			253	A	0.0265	0.01641	-0.0005
			254	C	0.0736	0.023697	-0.0231
			255	C	-0.0301	0.016194	0.0159
			256	G	0.0031	0.014145	0.003
			257	A	0.0282	0.017897	-0.0006
			258	A	0.0218	0.014504	-0.0147
			259	A	0.0106	0.013086	-0.0085
			260	G	-0.0176	0.012235	-0.0091
			261	G	0.0117	0.012238	-0.0042
			262	U	0.0031	0.008276	-0.0097
			263	A	0.0096	0.012662	0.0157
			264	A	0.0566	0.018749	-0.0263
			265	G	0.0011	0.009407	-0.0048
			266	A	-0.0046	0.011952	-0.0064
			267	U	0.0118	0.011176	0.0034
			268	G	-0.0247	0.009829	0.0008
			269	G	-0.012	0.015559	0.0299
			270	A	0.0403	0.018252	0.0154
			271	G	0.0131	0.012804	-0.0067
			272	A	0.0201	0.011039	-0.0087
			273	G	0.0051	0.011176	-0.0067
			274	C	0.003	0.019876	-0.0245
			275	C	-0.0135	0.011315	-0.0082
			276	U	0.0636	0.021366	-0.0151
			277	U	0.0356	0.011113	-0.0086
			278	G	0.0114	0.017117	0.0017
			279	U	0.0326	0.016483	-0.0062
			280	C	-0.0165	0.015559	-0.003
			281	C	-0.0252	0.014921	-0.0041
			282	C	-0.0165	0.023056	-0.0468
			283	U	0.0198	0.023555	-0.01
			284	G	0.0526	0.015143	-0.0086
			285	G	0.1787	0.025972	-0.0814
			286	U	0.0694	0.017692	-0.0256
			287	U	0.1542	0.009742	-0.0005
			288	U	0.0397	0.00921	-0.0098
			289	C	-0.0288	0.015628	0.0266
			290	A	0.0243	0.014431	-0.0069
			291	A	0.0413	0.021859	-0.0218
			292	C	0.0449	0.030345	-0.0358
			293	G	0.0366	0.016059	-0.0188
			294	A	0.0268	0.014573	-0.012
			295	G	0.0414	0.019383	-0.0483
			296	G	-0.0032	0.011317	-0.0012
			297	G	-0.0119	0.009618	0.0014
			298	A	0.0677	0.008374	-0.0058
			299	G	0.0544	0.016205	-0.0321
			300	U	0.0481	0.014577	-0.0341
			301	C	0.0623	0.010696	0.0343
			302	A	0.045	0.009418	0.0084
			303	A	0.0986	0.014873	-0.0073
			304	A	0.0508	0.021435	-0.0352
			305	G	0.0182	0.012028	0.0029
			306	U	0.095	0.012832	-0.0016
			307	U	0.0193	0.009976	-0.0002
			308	C	-0.0126	0.015772	0.033
			309	U	0.2947	0.012381	-0.0223
			310	G	0.1812	0.020753	-0.0049
			311	U	0.1136	0.016717	0.0118
			312	U	0.0772	0.009936	-0.0013
			313	U	0.0077	0.00559	-0.0056
			314	G	0.0979	0.020592	-0.0134
			315	C	0.0288	0.025604	-0.0363
			316	C	-0.0056	0.0157	0.0004
			317	C	0.0879	0.028438	-0.0594
			318	U	0.0612	0.019456	-0.043
			319	G	-0.0118	0.013507	0.0102
			320	A	0.1143	0.01073	0.0082
			321	U	0.1059	0.010934	0.0006
			322	C	0.0011	0.015066	-0.0078
			323	U	0.0472	0.015284	-0.0212
			324	G	0.0004	0.028504	-0.0499
			325	C	0.0478	0.015635	-0.001
			326	A	0.036	0.006736	-0.0004
			327	U	0.0513	0.009559	0.0008
			328	C	0.085	0.018466	-0.0116
			329	G	0.1329	0.026532	-0.0433
			330	C	0.0528	0.029424	-0.0466
			331	U	0.0348	0.017755	-0.0166
			332	G	0.4232	0.021834	0.0112
			333	U	0.0302	0.008637	0.0142
			334	G	0.0529	0.009708	0.0042
			335	G	0.0346	0.024686	-0.0311
			336	C	-0.0288	0.037697	0.0364
			337	C	0.0177	0.020655	-0.0142
			338	G	0.0068	0.016621	0.0258
			339	A	0.1002	0.011759	0.0137
			340	G	0.0078	0.018248	0.0224
			341	G	0.0682	0.032183	-0.0246
			342	C	0.0508	0.024545	-0.0078
			343	C	-0.0301	0.009617	0.0102
			344	A	0.0245	0.017755	-0.0435
			345	A	0.0278	0.023131	0.0377
			346	G	0.025	0.020017	-0.0099
			347	C	0.0494	0.022069	-0.0145
			348	C	-0.0059	0.008628	0.0001
			349	C	-0.0326	0.008627	0.0041
			350	A	0.0572	0.011254	0.0045
			351	C	0.0307	0.030624	0.014
			352	C	-0.0086	0.026663	0.0405
			353	G	-0.027	0.017397	0.0164
			354	A	0.2661	0.013854	0.0077
			355	G	-0.0376	0.011809	0.051
			356	A	0.033	0.006868	0.0019
			357	A	0.0947	0.010837	0.0023
			358	C	0.1195	0.015357	-0.0138
			359	A	0.0082	0.009479	0.0151
			360	A	0.0148	0.015914	0.012
			361	C	0.1043	0.024335	0.0135
			362	G	0.069	0.014221	-0.0031
			363	A	0	0	0
			364	a	NA	NA	NA
			365	g	NA	NA	NA
			366	a	NA	NA	NA
			367	c	NA	NA	NA
			368	u	NA	NA	NA
			369	u	NA	NA	NA
			370	c	NA	NA	NA
			371	a	NA	NA	NA
			372	a	NA	NA	NA
			373	c	NA	NA	NA
			374	a	NA	NA	NA
			375	u	NA	NA	NA
			376	c	NA	NA	NA
			377	g	NA	NA	NA
			378	u	NA	NA	NA
			379	g	NA	NA	NA
			380	g	NA	NA	NA
			381	c	NA	NA	NA
			382	c	NA	NA	NA
			383	g	NA	NA	NA
						NA	NA

## Sheet: Figure 2c
			Lowercases indicate primer binding site in amplicon sequencing
			NA: not applicable
			nucleotide	Sequence	ΔΔMutation rate	-LogP
			6	a	NA	NA
			7	g	NA	NA
			8	g	NA	NA
			9	u	NA	NA
			10	u	NA	NA
			11	u	NA	NA
			12	a	NA	NA
			13	u	NA	NA
			14	a	NA	NA
			15	c	NA	NA
			16	c	NA	NA
			17	u	NA	NA
			18	u	NA	NA
			19	c	NA	NA
			20	c	NA	NA
			21	c	NA	NA
			22	a	NA	NA
			23	g	NA	NA
			24	g	NA	NA
			25	u	NA	NA
			26	a	NA	NA
			27	a	NA	NA
			28	c	NA	NA
			29	A	-0.0007	0.942057
			30	A	0.0624	1.8512
			31	A	0.0057	0.622226
			32	C	0.0316	1.41489
			33	C	-0.0662	2.58762
			34	A	0.0566	2.57755
			35	A	0.0678	2.16122
			36	C	0.0851	2.11219
			37	C	-0.0383	2.26145
			38	A	0.0343	2.46092
			39	A	0.1416	3.44879
			40	C	0.0931	3.23266
			41	U	0.0869	2.5897
			42	U	0.154	2.87869
			43	U	0.079	2.52492
			44	C	0.0448	1.93562
			45	G	0.0215	1.16093
			46	A	0.0937	2.82853
			47	U	0.0193	1.60061
			48	C	0.0369	2.18627
			49	U	-0.0016	0.398505
			50	C	0.0095	0.75053
			51	U	0.1547	2.42547
			52	U	0.0243	1.34168
			53	G	0.1221	2.36955
			54	U	0.0001	0.305755
			55	A	0.0289	1.75681
			56	G	-0.0028	0.464228
			57	A	0.0216	1.49843
			58	U	0.0254	1.70677
			59	C	-0.0049	0.553139
			60	U	0.0075	0.76895
			61	G	0.3562	3.29623
			62	U	0.2071	3.05812
			63	U	0.0311	1.81118
			64	C	0.083	2.37813
			65	U	0.0175	1.16194
			66	C	-0.0111	0.983758
			67	U	0.0315	1.95334
			68	A	0.0154	1.33124
			69	A	0.0032	0.553033
			70	A	0.0361	1.94139
			71	C	0.026	1.44256
			72	G	0.0261	1.62127
			73	A	0.0006	0.372127
			74	A	0.0342	1.94678
			75	C	0.0055	0.426287
			76	U	0.1381	2.4845
			77	U	0.0761	2.12395
			78	U	0.1854	3.34138
			79	A	0.0562	2.02835
			80	A	0.306	3.45724
			81	A	0.0609	2.46426
			82	A	0.1868	3.42652
			83	U	0.0414	2.11499
			84	C	-0.0129	1.08006
			85	U	0.0451	1.89341
			86	G	0.1929	2.68611
			87	U	0.0076	0.727978
			88	G	0.0245	1.67732
			89	U	0.0185	1.33622
			90	G	-0.0153	1.45394
			91	G	0.0602	1.68834
			92	C	0.055	1.83669
			93	U	0.0149	1.13308
			94	G	0.1111	2.24979
			95	U	0.0401	1.77755
			96	C	-0.0703	2.59633
			97	A	0.1158	2.9704
			98	C	0.0338	1.6335
			99	U	0.0112	0.920274
			100	C	-0.0221	1.15214
			101	G	0.0356	1.58484
			102	G	0.0523	1.42804
			103	C	0.0461	1.74534
			104	U	0.0333	1.95808
			105	G	0.0679	1.98144
			106	C	0.0755	1.90287
			107	G	0.1143	2.10242
			108	U	-0.0007	0.343008
			109	G	0.0344	1.24121
			110	C	0.0513	1.61571
			111	U	0.0439	1.66175
			112	U	0.0309	1.50331
			113	A	0.0417	2.13393
			114	G	0.1192	2.12843
			115	U	0.0222	1.61028
			116	G	0.0383	1.52518
			117	C	0.0748	1.67294
			118	A	0.0404	2.04864
			119	C	0.0478	1.57313
			120	U	0.042	1.97528
			121	C	-0.0406	1.96417
			122	A	0.0828	2.57691
			123	C	0.0348	1.2782
			124	G	0.0497	1.47955
			125	C	0.0307	1.317
			126	A	0.0126	0.976369
			127	G	0.0714	1.76425
			128	U	0.0063	0.758938
			129	A	0.0741	3.04766
			130	U	0.0444	2.55737
			131	A	0.1747	3.53057
			132	A	0.0249	1.40913
			133	U	0.1318	2.87826
			134	U	0.0207	1.51703
			135	A	0.0348	2.01561
			136	A	0.3442	3.9414
			137	U	0.0269	1.85038
			138	A	0.0246	1.8614
			139	A	0.0733	2.33345
			140	C	0.1837	3.46859
			141	U	0.0653	2.48377
			142	A	0.0472	2.4213
			143	A	0.1168	3.39138
			144	U	0.1728	3.54766
			145	U	0.2053	3.74145
			146	A	0.1266	3.02759
			147	C	0.0347	1.99272
			148	U	0.0056	0.780049
			149	G	0.6015	3.96851
			150	U	0.0547	2.18224
			151	C	-0.0497	2.00871
			152	G	0.0404	1.59127
			153	U	0.0365	1.85252
			154	U	0.0151	1.32866
			155	G	-0.0238	1.59315
			156	A	0.0149	1.22826
			157	C	0.0931	1.96064
			158	A	0.0146	0.958069
			159	G	-0.0121	0.687905
			160	G	-0.0265	1.5549
			161	A	0.0116	1.03745
			162	C	0.0491	2.00285
			163	A	0.0401	2.08101
			164	C	0.1203	2.0303
			165	G	0.0124	0.744348
			166	A	0.0244	1.37686
			167	G	0.0078	0.750841
			168	U	0.0058	0.863916
			169	A	0.0223	2.26779
			170	A	0.0542	2.63828
			171	C	-0.0057	0.739075
			172	U	0.0125	1.10559
			173	C	-0.0453	2.0509
			174	G	1.6102	4.34612
			175	U	0.024	1.28374
			176	C	-0.0074	0.750323
			177	U	0.0146	1.47062
			178	A	0.0083	1.13322
			179	U	0.0166	1.58874
			180	C	-0.029	2.18467
			181	U	0.0204	1.3558
			182	U	0.01	0.898274
			183	C	0.0023	0.427966
			184	U	0.0164	1.16532
			185	G	0.125	2.19781
			186	C	0.0474	1.35276
			187	A	0.1609	2.81606
			188	G	0.0123	0.914943
			189	G	0.0474	1.71756
			190	C	0.0015	0.399812
			191	U	0.0142	1.17373
			192	G	0.0673	1.76128
			193	C	0.0214	1.20063
			194	U	0.0176	1.36237
			195	U	0.026	1.75214
			196	A	0.0227	1.68911
			197	C	0.0918	2.07015
			198	G	0.001	0.342353
			199	G	0.0372	1.49561
			200	U	0.0333	1.58741
			201	U	0.0242	1.69333
			202	U	0.0003	0.326806
			203	C	-0.0265	1.84612
			204	G	0.1459	2.85472
			205	U	0.0618	2.11767
			206	C	-0.0298	1.26075
			207	C	0.0109	0.653873
			208	G	0.098	1.8749
			209	U	0.032	1.6819
			210	G	0.0456	1.65513
			211	U	0.073	2.0461
			212	U	0.0294	1.74106
			213	G	0.0745	1.93788
			214	C	0.0786	1.8241
			215	A	0.0081	0.692425
			216	G	0.0743	1.72831
			217	C	0.0954	1.7944
			218	C	-0.0139	1.0616
			219	G	-0.0166	1.04469
			220	A	0.1625	3.18094
			221	U	0.0043	0.489459
			222	C	0.0229	1.57965
			223	A	0.0318	2.00552
			224	U	0.0124	1.17949
			225	C	-0.0024	0.409762
			226	A	0.0143	1.05652
			227	G	0.0766	1.87923
			228	C	0.0243	1.12954
			229	A	0.0171	1.80323
			230	C	0.0028	0.684355
			231	A	-0.0003	0.331299
			232	U	0.0109	1.04437
			233	C	0	#VALUE!
			234	U	0.0125	1.07715
			235	A	0.0398	1.82212
			236	G	0.0142	1.10897
			237	G	0.0443	2.0202
			238	U	-0.0037	0.536564
			239	U	0.0174	1.44971
			240	U	0.002	0.515026
			241	C	-0.0435	2.05114
			242	G	0.0948	2.42191
			243	U	0.0201	1.28172
			244	C	0.016	0.855979
			245	C	0.0174	0.798772
			246	G	0.0672	1.74205
			247	G	0.0098	0.560482
			248	G	0.0916	1.89262
			249	U	0.0139	1.23236
			250	G	0.0197	1.31563
			251	U	0.0155	1.38663
			252	G	-0.0661	2.20758
			253	A	0.0265	1.26926
			254	C	0.0736	1.78436
			255	C	-0.0301	1.37446
			256	G	0.0031	0.431351
			257	A	0.0282	1.25134
			258	A	0.0218	1.21722
			259	A	0.0106	0.830151
			260	G	-0.0176	1.18601
			261	G	0.0117	0.921578
			262	U	0.0031	0.535348
			263	A	0.0096	0.796486
			264	A	0.0566	1.76089
			265	G	0.0011	0.367426
			266	A	-0.0046	0.542403
			267	U	0.0118	0.981012
			268	G	-0.0247	1.61135
			269	G	-0.012	0.805046
			270	A	0.0403	1.50811
			271	G	0.0131	0.961826
			272	A	0.0201	1.35882
			273	G	0.0051	0.591652
			274	C	0.003	0.388159
			275	C	-0.0135	1.05865
			276	U	0.0636	1.74931
			277	U	0.0356	1.80997
			278	G	0.0114	0.735268
			279	U	0.0326	1.42211
			280	C	-0.0165	0.983713
			281	C	-0.0252	1.30235
			282	C	-0.0165	0.76846
			283	U	0.0198	0.849714
			284	G	0.0526	1.87727
			285	G	0.1787	2.45793
			286	U	0.0694	1.97916
			287	U	0.1542	3.17792
			288	U	0.0397	2.05873
			289	C	-0.0288	1.36792
			290	A	0.0243	1.30015
			291	A	0.0413	1.38696
			292	C	0.0449	1.20602
			293	G	0.0366	1.53321
			294	A	0.0268	1.36639
			295	G	0.0414	1.48199
			296	G	-0.0032	0.473167
			297	G	-0.0119	1.08262
			298	A	0.0677	2.59679
			299	G	0.0544	1.8488
			300	U	0.0481	1.83449
			301	C	0.0623	2.31501
			302	A	0.045	2.14609
			303	A	0.0986	2.42599
			304	A	0.0508	1.56434
			305	G	0.0182	1.22201
			306	U	0.095	2.52098
			307	U	0.0193	1.40507
			308	C	-0.0126	0.822962
			309	U	0.2947	3.53178
			310	G	0.1812	2.66314
			311	U	0.1136	2.44726
			312	U	0.0772	2.56256
			313	U	0.0077	1.1556
			314	G	0.0979	2.14182
			315	C	0.0288	1.02062
			316	C	-0.0056	0.523106
			317	C	0.0879	1.78035
			318	U	0.0612	1.79485
			319	G	-0.0118	0.870598
			320	A	0.1143	2.83496
			321	U	0.1059	2.75266
			322	C	0.0011	0.341544
			323	U	0.0472	1.77963
			324	G	0.0004	0.308558
			325	C	0.0478	1.77132
			326	A	0.036	2.24151
			327	U	0.0513	2.24504
			328	C	0.085	2.11433
			329	G	0.1329	2.1862
			330	C	0.0528	1.34778
			331	U	0.0348	1.41513
			332	G	0.4232	3.35354
			333	U	0.0302	1.88276
			334	G	0.0529	2.25802
			335	G	0.0346	1.16773
			336	C	-0.0288	0.800298
			337	C	0.0177	0.860087
			338	G	0.0068	0.559077
			339	A	0.1002	2.64211
			340	G	0.0078	0.571698
			341	G	0.0682	1.47582
			342	C	0.0508	1.45736
			343	C	-0.0301	1.79074
			344	A	0.0245	1.15683
			345	A	0.0278	1.06341
			346	G	0.025	1.08885
			347	C	0.0494	1.51894
			348	C	-0.0059	0.747239
			349	C	-0.0326	1.94779
			350	A	0.0572	2.19865
			351	C	0.0307	0.949544
			352	C	-0.0086	0.499909
			353	G	-0.027	1.24032
			354	A	0.2661	3.34569
			355	G	-0.0376	1.80491
			356	A	0.033	2.1508
			357	A	0.0947	2.66383
			358	C	0.1195	2.56382
			359	A	0.0082	0.865206
			360	A	0.0148	0.905667
			361	C	0.1043	2.05389
			362	G	0.069	2.15907
			363	A	0	0
			364	a	NA	NA
			365	g	NA	NA
			366	a	NA	NA
			367	c	NA	NA
			368	u	NA	NA
			369	u	NA	NA
			370	c	NA	NA
			371	a	NA	NA
			372	a	NA	NA
			373	c	NA	NA
			374	a	NA	NA
			375	u	NA	NA
			376	c	NA	NA
			377	g	NA	NA
			378	u	NA	NA
			379	g	NA	NA
			380	g	NA	NA
			381	c	NA	NA
			382	c	NA	NA
			383	g	NA	NA

## Sheet: Figure 2d
					ΔMutation rate
					C30-FAI		C30-FAI on average		FAI-N3		FAI-N3 on average
				Concentration (mM)	Mean	SD	Mean	SD	Mean	SD	Mean	SD
				0.02	0.6022	0.0176	-0.02408	0.010552	-0.0127	0.016	-0.00651	0.010602
				0.1	1.6713	0.0211	0.044225	0.011225	0.0611	0.016	-0.00625	0.010512

## Sheet: Figure 4c
						Normalized RNA level
					Log[M]	C64		C65
					-5.52288	0.207207	0.198589	0.584195	0.617266
					-6	0.221656	0.193568	0.627013	0.637736
					-6.47712	0.378638	0.208314	0.697663	0.71641
					-6.95424	0.695084	0.48142	0.800985	0.803328
					-7.43136	0.753285	0.570386	0.795865	0.88349
					-7.90849	1.00762	1.00766	0.952074	1.12021
					-8.38561	1.06698	0.948897	1.02851	1.0069
					-8.86273			1	1

## Sheet: Figure 4d
						Virus infection normalized RLU							Cell viability normalized RLU
					Log[M]	C65			C64				C65			C64
					-4.69897	0.387428	0.643649	0.379258	0.151506	0.050558	0.042651		0.926508	0.859066	0.909446	0.983758	1.11163	0.938971
					-5	0.322046	0.656602	0.3165	0.35277	0.156635	0.268125		0.929491	0.92124	0.911398	1.02385	0.989039	0.97768
					-5.30103	0.558842	0.385768	0.543636	0.791188	0.452725	0.635906		1.01552	0.997405	0.999656	0.960906	1.00938	1.08112
					-5.60206	0.495878	0.563921	0.48664	0.725368	0.640874	0.561715		0.965765	1.02525	1.00936	0.95553	1.02447	0.988191
					-5.90309	0.659272	0.622445	0.637659	0.171219*	0.924101	0.778691		0.983883	1.05966	0.935454	0.903407	0.997418	1.01825
					-6.20412	0.953117	0.348168*	0.922829	0.371676*	1.03127	0.972609		0.998348	0.984047	1.02101	0.909489	1.09246	1.03333
					-6.50515	0.876955	0.453261*	0.850987	1.06487	1.07255	0.805965		1.05245	1.00847	0.929147	0.900213	1.02304	1.01507
					-6.80618	1.00698	0.734622	0.986224	0.969146	1.11457	1.124		1.00437	0.998919	0.991001	1.03658	1.09176	0.97014
					-7.10721	0.979794	0.955365	0.917191	0.889663	0.852898	1.24176		0.995109	0.997778	0.97906	0.902948	1.08143	1.08604
					-7.40823	0.921514	1.02361	0.923311	1.04452	1.24349	1.02213		0.96949	1.03951	0.990855	0.956838	1.04352	1.10764
					-7.70928	0.855671	1.03978	1.0099	0.738891	0.922076	1.11051		0.992473	0.992791	0.990758	0.997084	1.00153	0.984521
					-8.01028	1.16239	1.11367	0.985191	0.857218	0.825321	1.21824		0.95824	1.05387	1.01615	0.990414	1.0233	1.00218
					-8.31131	1.09669	0.995927	1.04539	0.980359	0.962883	0.946163		0.993561	1.00718	1.0108	0.929146	0.93625	0.954105
					-8.61243	0.894675	0.997279	1.11756	1.01743	0.999023	1.19306		0.995508	0.995397	1.0533	0.958502	0.952014	0.939841
n

## Sheet: Supplementary Fig. S1
					mP
				Log[M]	compound C2		compound C4		compound C6		compoundC29		compoundC30		compound C32		compound C36		compound C31
				-4.92082	262	269	251	249	256	256	307	312	317	318	321	319	260	260	295	294
				-5.22185	243	247	237	241	239	228	306	309	316	319	315	315	245	250	284	285
				-5.52288	224	220	207	214	225	223	298	306	312	315	314	309	236	230	262	262
				-5.82391	199	198	190	183	204	199	281	289	310	299	294	285	201	199	235	235
				-6.12494	175	173	147	147	185	185	256	259	284	287	274	274	178	178	194	195
				-6.42597	147	144	133	123	173	169	229	218	261	254	232	229	150	143	157	156
				-6.727	124	127	98	107	161	160	194	196	226	224	197	192	138	142	125	123
				-7.02803	115	118	90	93	153	152	174	172	188	190	172	175	136	142	106	96
				Log[M]	compound C34
				-5.22185	271	269
				-5.52288	271	267
				-5.82391	260	262
				-6.12494	244	247
				-6.42597	228	234
				-6.74473	207	202
				-7.04576	191	186
				-7.39794	167	160
				-7.69897	149	152
				-8	137	145
				-8.30103	131	140
				-8.69897	120	125
				-9	117	118
				-9.1549	118	117

## Sheet: Supplementary Fig. S2
									C30-alkyne
								Log(M)	FP
								-4.92082	271	271
								-5.22185	238	248
								-5.52288	203	203
								-5.82391	160	171
								-6.12494	127	134
								-6.42597	109	110
								-6.74473	95	95
								-7.04576	88	88
								-7.39794	83	82
								-7.69897	81	79

## Sheet: Supplementary Fig. S3b
				Lowercases indicate primer binding site in amplicon sequencing
				NA: not applicable
				nucleotide	Sequence	ΔΔMutation rate [(C30-FAI - DMSO) - (FAI-N3 - DMSO)]	SD	ΔMutation rate (FAI-N3 - DMSO)
				6	a	NA	NA	NA
				7	g	NA	NA	NA
				8	g	NA	NA	NA
				9	u	NA	NA	NA
				10	u	NA	NA	NA
				11	u	NA	NA	NA
				12	a	NA	NA	NA
				13	u	NA	NA	NA
				14	a	NA	NA	NA
				15	c	NA	NA	NA
				16	c	NA	NA	NA
				17	u	NA	NA	NA
				18	u	NA	NA	NA
				19	c	NA	NA	NA
				20	c	NA	NA	NA
				21	c	NA	NA	NA
				22	a	NA	NA	NA
				23	g	NA	NA	NA
				24	g	NA	NA	NA
				25	u	NA	NA	NA
				26	a	NA	NA	NA
				27	a	NA	NA	NA
				28	c	NA	NA	NA
				29	A	0.0007	0.000583	0
				30	A	0.0282	0.00892	-0.0249
				31	A	0.0017	0.003183	-0.0015
				32	C	0.01	0.003895	-0.0064
				33	C	-0.0133	0.007071	-0.0426
				34	A	0.0442	0.003536	-0.0001
				35	A	0.044	0.004134	0.0008
				36	C	0.0341	0.00464	0.001
				37	C	-0.0061	0.006294	-0.0321
				38	A	0.035	0.003499	0.0034
				39	A	0.138	0.006037	0.0003
				40	C	0.0938	0.005371	-0.0041
				41	U	0.0964	0.008402	-0.011
				42	U	0.1224	0.00568	-0.0002
				43	U	0.0479	0.004604	-0.0017
				44	C	0.0379	0.006454	-0.0158
				45	G	0.0249	0.007292	-0.0315
				46	A	0.0967	0.004875	0.0026
				47	U	0.0086	0.004742	-0.0057
				48	C	0.071	0.007341	-0.031
				49	U	-0.0018	0.004455	-0.0081
				50	C	0.0468	0.00921	-0.0585
				51	U	0.0871	0.006546	-0.001
				52	U	0.0137	0.00397	0.0007
				53	G	0.102	0.006297	0.0005
				54	U	0.0031	0.003962	0.0029
				55	A	0.0428	0.003996	0.0043
				56	G	0.0316	0.007582	-0.0177
				57	A	0.0111	0.002921	0.0008
				58	U	0.0144	0.00588	-0.0123
				59	C	-0.013	0.006788	-0.0197
				60	U	-0.0038	0.003677	-0.0022
				61	G	0.3128	0.010308	-0.0144
				62	U	0.1966	0.007877	-0.0071
				63	U	0.033	0.005263	-0.0095
				64	C	0.0976	0.009027	-0.0399
				65	U	0.0063	0.00559	-0.0171
				66	C	0.0118	0.007004	-0.0571
				67	U	0.0823	0.004876	-0.0159
				68	A	0.0271	0.004561	-0.0015
				69	A	0.0109	0.004817	-0.0019
				70	A	0.0601	0.004159	-0.0021
				71	C	0.0447	0.00564	-0.0054
				72	G	0.1309	0.009481	-0.0591
				73	A	0.0036	0.002484	0.0013
				74	A	0.0531	0.00572	-0.0095
				76	U	0.1031	0.010448	-0.0162
				77	U	0.0725	0.005769	0.0002
				78	U	0.1981	0.006946	0.0056
				79	A	0.0413	0.005982	-0.013
				80	A	0.3425	0.009443	0.0072
				81	A	0.0609	0.00636	-0.0078
				82	A	0.1797	0.006203	0.0029
				83	U	0.0156	0.005099	-0.0058
				84	C	0.0211	0.00588	-0.0207
				85	U	0.0002	0.003748	0.0017
				86	G	0.1511	0.008405	-0.0289
				87	U	-0.0056	0.004525	-0.0021
				88	G	0.0374	0.003966	-0.0046
				89	U	0.0232	0.005532	-0.0064
				90	G	0.0089	0.006438	-0.0377
				91	G	0.0015	0.006224	-0.0209
				92	C	-0.0057	0.006152	-0.0253
				93	U	-0.002	0.004455	-0.0038
				94	G	0.1349	0.006964	-0.0036
				95	U	0.0116	0.005946	-0.0043
				96	C	-0.0127	0.006788	-0.0397
				97	A	0.2145	0.007077	0.0038
				98	C	0.0082	0.003829	-0.0076
				99	U	0.0049	0.00446	-0.008
				100	C	-0.0092	0.007708	-0.046
				101	G	0.0276	0.007998	-0.032
				102	G	-0.0018	0.007779	-0.028
				103	C	-0.0098	0.00594	-0.0401
				104	U	0.01	0.004817	-0.0034
				105	G	0.0127	0.005664	-0.0065
				106	C	0.0071	0.006014	-0.0201
				107	G	0.1059	0.006381	-0.003
				108	U	0.0066	0.003471	-0.0014
				109	G	0.011	0.005099	-0.0201
				110	C	0.0282	0.007084	-0.0231
				111	U	0.0259	0.007574	-0.0058
				112	U	0.0115	0.00524	0
				113	A	0.0646	0.005215	0.0108
				114	G	0.0536	0.006341	-0.005
				115	U	0.0288	0.00442	0.0023
				116	G	0.0025	0.006224	-0.0155
				117	C	0	0.007638	-0.0305
				118	A	0.0411	0.004465	0
				119	C	0.0019	0.005235	-0.0014
				120	U	0.0315	0.004841	-0.0018
				121	C	-0.0057	0.007284	-0.0502
				122	A	0.1601	0.006708	-0.0074
				123	C	0.0104	0.005664	-0.0051
				124	G	0.0209	0.007009	-0.0142
				125	C	-0.0022	0.004738	-0.02
				126	A	0.0015	0.00488	-0.0059
				127	G	0.0017	0.00481	-0.0048
				128	U	-0.002	0.00389	0.0061
				129	A	0.1165	0.005162	0.0049
				130	U	0.0672	0.004653	0.0006
				131	A	0.1967	0.006519	0.0038
				132	A	0.0116	0.003624	0.0002
				133	U	0.138	0.00676	0.0018
				134	U	0.0317	0.003828	-0.0033
				135	A	0.0441	0.00508	0.0027
				136	A	0.3738	0.008732	0.007
				137	U	0.0246	0.00372	-0.003
				138	A	0.0248	0.004763	-0.0041
				139	A	0.0469	0.004272	-0.0033
				140	C	0.1671	0.006935	-0.0016
				141	U	0.0619	0.004855	-0.0059
				142	A	0.0736	0.0053	0.0036
				143	A	0.1721	0.00611	0
				144	U	0.1765	0.007566	-0.0045
				145	U	0.2032	0.007379	0.0045
				146	A	0.1207	0.006177	0.0023
				147	C	0.0168	0.004187	-0.0095
				148	U	0.0028	0.002973	-0.0038
				149	G	0.5122	0.010232	0.0005
				150	U	0.0472	0.00522	0.0031
				151	C	-0.0021	0.007497	-0.0392
				152	G	0.014	0.005523	-0.0063
				153	U	0.0318	0.005122	-0.0014
				154	U	0.0064	0.003471	-0.002
				155	G	-0.0014	0.005587	-0.0211
				156	A	0.015	0.004328	-0.0027
				157	C	0.0076	0.005308	-0.0157
				158	A	-0.0006	0.00481	-0.0027
				159	G	-0.0107	0.007849	-0.0255
				160	G	-0.0078	0.007142	-0.0295
				161	A	0.0034	0.003538	-0.005
				162	C	0.0403	0.006389	-0.007
				163	A	0.0187	0.00461	-0.0009
				164	C	0.0063	0.00559	-0.0063
				165	G	-0.0191	0.008202	-0.0501
				166	A	0.0119	0.003829	-0.0038
				167	G	0.0147	0.004534	-0.0061
				168	U	0.0028	0.004386	0.0003
				169	A	0.025	0.004	0.0028
				170	A	0.0385	0.005341	-0.0009
				171	C	-0.0017	0.003466	0.0004
				172	U	0.0023	0.003114	-0.0008
				173	C	-0.0266	0.008556	-0.0571
				174	G	2.1455	0.019962	0.0395
				175	U	0.0063	0.007852	-0.0232
				176	C	-0.0088	0.006081	-0.0265
				177	U	-0.0019	0.003183	0.0023
				178	A	0.0115	0.004111	-0.0065
				179	U	-0.0006	0.00488	-0.0102
				180	C	-0.0091	0.005587	-0.0202
				181	U	0.0095	0.004393	0.0005
				182	U	0.0008	0.003748	-0.0034
				183	C	-0.0065	0.005233	-0.0172
				184	U	-0.0005	0.003607	0.0011
				185	G	0.0274	0.006736	-0.002
				186	C	-0.012	0.007212	-0.0136
				187	A	0.1457	0.006576	0.0085
				188	G	0.0061	0.006083	-0.0168
				189	G	0.0011	0.005941	-0.0227
				190	C	-0.0055	0.005869	-0.0392
				191	U	0.003	0.004669	-0.0027
				192	G	-0.0076	0.006294	-0.0143
				193	C	-0.0051	0.006152	-0.0026
				194	U	0.0095	0.005099	0.0023
				195	U	-0.0024	0.003677	-0.0023
				196	A	0.0024	0.003821	-0.0006
				197	C	-0.0001	0.005162	-0.0079
				198	G	-0.0004	0.007993	-0.0408
				199	G	0.0138	0.008631	-0.0327
				200	U	-0.0014	0.007355	0.0046
				201	U	0.0027	0.005941	0.0218
				202	U	0.0029	0.003256	0.0016
				203	C	-0.0097	0.007212	-0.0158
				204	G	0.1488	0.007685	0.0088
				205	U	0.071	0.00845	-0.0189
				206	C	-0.0044	0.007779	-0.0274
				207	C	-0.0202	0.008344	-0.0206
				208	G	0.0001	0.005376	-0.0053
				209	U	0.0034	0.005235	0.0026
				210	G	0.0584	0.006701	-0.0102
				211	U	0.0709	0.006301	0.0021
				212	U	0.0207	0.004827	-0.0005
				213	G	0.0047	0.005873	-0.0082
				214	C	-0.01	0.005162	-0.0091
				215	A	0.0044	0.005166	-0.0082
				217	C	0.0005	0.007779	-0.0348
				218	C	-0.01	0.006718	-0.0265
				219	G	0.0127	0.007218	-0.0283
				220	A	0.1415	0.005515	0.0023
				221	U	-0.0104	0.005021	0.0018
				222	C	0.1075	0.00828	-0.0248
				223	A	0.033	0.003744	0.0007
				224	U	0.0077	0.004036	-0.0056
				225	C	-0.008	0.005657	-0.0119
				226	A	0.0122	0.004111	-0.0053
				227	G	0.0132	0.006088	-0.022
				228	C	0.0004	0.005376	-0.0188
				229	A	0.0025	0.003256	-0.0002
				230	C	-0.0064	0.00396	-0.0029
				231	A	-0.0014	0.00389	0.0006
				232	U	0.006	0.005517	-0.0125
				233	C	-0.0087	0.005021	-0.0073
				234	U	0.0097	0.003688	-0.0003
				235	A	0.0803	0.006801	0.049
				236	G	-0.0006	0.007921	-0.0223
				237	G	-0.0094	0.008981	-0.0262
				238	U	-0.0097	0.006364	0.0061
				239	U	0.0171	0.009694	0.0349
				240	U	0.0041	0.003397	0.0015
				241	C	0.0096	0.006935	-0.0304
				242	G	0.0602	0.00628	0.006
				243	U	0.0096	0.007501	-0.0107
				244	C	-0.0125	0.006435	-0.0209
				245	C	-0.0057	0.008911	-0.0275
				246	G	-0.0289	0.010041	-0.0149
				247	G	0.0005	0.008204	-0.0321
				248	G	-0.0107	0.007991	-0.0113
				249	U	-0.001	0.006435	-0.0124
				250	G	-0.0036	0.004455	0.0046
				251	U	0.0019	0.004386	-0.0013
				252	G	-0.0185	0.008698	-0.0618
				253	A	-0.0091	0.00594	-0.0032
				254	C	-0.0068	0.005657	-0.0006
				255	C	-0.0073	0.006294	-0.0213
				256	G	0.0211	0.009061	-0.0277
				257	A	0.0038	0.005449	0.0009
				258	A	0.0051	0.004393	-0.0017
				259	A	-0.0051	0.004455	-0.0055
				260	G	-0.0052	0.011456	-0.0359
				261	G	-0.014	0.010819	0.0091
				262	U	0.0029	0.00333	0.0001
				263	A	-0.0028	0.006648	0.0011
				264	A	-0.0016	0.005304	-0.0051
				265	G	0.0107	0.005597	-0.0107
				266	A	0.0019	0.004669	-0.0018
				267	U	0.0012	0.004952	0.0031
				268	G	-0.0095	0.00792	-0.0162
				269	G	-0.0138	0.008202	-0.0422
				270	A	0.0104	0.00637	-0.0064
				271	G	-0.0079	0.006011	-0.0254
				272	A	0.0034	0.005235	0.0004
				273	G	-0.0014	0.009548	-0.0446
				274	C	-0.0136	0.007001	-0.0195
				275	C	-0.0627	0.009841	0.0061
				276	U	0.0053	0.005449	0.0007
				277	U	0.0071	0.004252	0.0002
				278	G	0.0089	0.008563	0.0069
				279	U	0.008	0.0104	-0.0274
				280	C	0.0163	0.00927	-0.0356
				281	C	-0.0069	0.008839	-0.0212
				282	C	-0.0012	0.013155	-0.0477
				283	U	0.0075	0.0104	-0.0243
				284	G	0.0651	0.010167	-0.0176
				286	U	0.0685	0.00836	-0.0133
				287	U	0.1442	0.007961	0.0076
				288	U	0.0532	0.006882	-0.0129
				289	C	-0.0184	0.011243	-0.0034
				290	A	0.0071	0.00637	0.0004
				291	A	0.0072	0.004393	-0.0076
				292	C	-0.0005	0.005376	-0.0029
				293	G	-0.0109	0.007142	-0.0362
				294	A	0.014	0.006378	-0.002
				295	G	0.0206	0.011254	-0.015
				296	G	-0.004	0.008204	-0.0175
				297	G	0.0023	0.007779	-0.0433
				298	A	0.0652	0.005745	0.0032
				299	G	0.0019	0.006155	0.0006
				300	U	0.0053	0.007925	0.0056
				301	C	0.1372	0.01114	-0.0445
				302	A	0.049	0.007606	-0.0082
				303	A	0.1248	0.007616	0.005
				304	A	-0.0026	0.005941	-0.0007
				305	G	0.0163	0.01005	-0.0217
				306	U	0.1145	0.008989	0.002
				307	U	0.019	0.006107	-0.0069
				308	C	0.0134	0.011531	-0.0478
				309	U	0.2812	0.009601	-0.011
				310	G	0.244	0.013119	-0.0365
				311	U	0.1285	0.010683	-0.0169
				312	U	0.0942	0.007083	0.0019
				313	U	0.0041	0.002625	-0.0012
				314	G	0.0906	0.007603	-0.0314
				315	C	0.0146	0.011034	-0.0131
				316	C	-0.0011	0.007072	-0.0272
				317	C	0.005	0.012945	-0.0246
				318	U	0.0008	0.007852	-0.0102
				319	G	0.0082	0.008422	-0.0159
				320	A	0.1258	0.007382	0.0066
				321	U	0.112	0.008431	-0.0202
				322	C	0.0075	0.007359	-0.0148
				323	U	0.002	0.003962	0.0011
				324	G	0.0035	0.007004	-0.0011
				325	C	0.0086	0.00524	-0.0074
				326	A	0.0295	0.004301	0.0016
				327	U	0.0557	0.005686	-0.0059
				328	C	0.0746	0.008964	-0.0161
				329	G	0.0806	0.010183	-0.02
				330	C	0.0125	0.009767	-0.0304
				331	U	0.0017	0.008134	-0.0033
				332	G	0.3531	0.01163	-0.0195
				333	U	0.0455	0.005077	-0.0027
				334	G	0.0459	0.00831	-0.0328
				335	G	0.0089	0.009197	-0.0555
				336	C	0.0081	0.010893	-0.0713
				337	C	0.0013	0.008134	-0.0323
				338	G	0.0257	0.008853	-0.0601
				339	A	0.0656	0.004974	-0.0003
				340	G	0.0011	0.00679	-0.0363
				341	G	0.0013	0.012166	-0.057
				342	C	0.0857	0.00792	-0.0365
				343	C	0.0038	0.006366	-0.0413
				344	A	0.0016	0.004104	0.0028
				345	A	-0.0035	0.004808	0.0028
				346	G	0.0226	0.007366	-0.0505
				347	C	0.0113	0.007286	-0.0364
				348	C	-0.0058	0.007142	-0.0349
				349	C	-0.0168	0.008698	-0.0248
				350	A	0.0653	0.005354	-0.0013
				351	C	0.0029	0.006224	-0.0037
				352	C	-0.0194	0.008202	0.0054
				353	G	-0.0016	0.008769	-0.0399
				354	A	0.2017	0.007187	0.0092
				355	G	-0.0081	0.009618	-0.012
				356	A	0.0267	0.004301	0.0015
				357	A	0.0567	0.004771	-0.0022
				358	C	0.058	0.005325	-0.0074
				359	A	0.0042	0.002484	-0.0004
				360	A	0.0009	0.004031	-0.0043
				361	C	0.0101	0.004817	-0.0024
				362	G	0.0743	0.00664	-0.0158
				363	A	0	0	0
				364	a	NA	NA	NA
				365	g	NA	NA	NA
				366	a	NA	NA	NA
				367	c	NA	NA	NA
				368	u	NA	NA	NA
				369	u	NA	NA	NA
				370	c	NA	NA	NA
				371	a	NA	NA	NA
				372	a	NA	NA	NA
				373	c	NA	NA	NA
				374	a	NA	NA	NA
				375	u	NA	NA	NA
				376	c	NA	NA	NA
				377	g	NA	NA	NA
				378	u	NA	NA	NA
				379	g	NA	NA	NA
				380	g	NA	NA	NA
				381	c	NA	NA	NA
				382	c	NA	NA	NA
				383	g	NA	NA	NA

## Sheet: Supplementary Fig. S3c
					Lowercases indicate primer binding site in amplicon sequencing
					NA: not applicable
					nucleotide	Sequence	ΔΔMutation rate	-LogP
					6	a	NA	NA
					7	g	NA	NA
					8	g	NA	NA
					9	u	NA	NA
					10	u	NA	NA
					11	u	NA	NA
					12	a	NA	NA
					13	u	NA	NA
					14	a	NA	NA
					15	c	NA	NA
					16	c	NA	NA
					17	u	NA	NA
					18	u	NA	NA
					19	c	NA	NA
					20	c	NA	NA
					21	c	NA	NA
					22	a	NA	NA
					23	g	NA	NA
					24	g	NA	NA
					25	u	NA	NA
					26	a	NA	NA
					27	a	NA	NA
					28	c	NA	NA
					29	A	0.0011	1.0065
					30	A	-0.0761	1.74824
					31	A	-0.0138	0.874036
					32	C	-0.0262	1.01945
					33	C	-0.0274	1.49675
					34	A	0.0355	1.73786
					35	A	0.0072	0.532391
					36	C	-0.0207	0.813859
					37	C	-0.0565	2.20458
					38	A	0.0203	1.67939
					39	A	0.132	3.09535
					40	C	0.0557	2.45949
					41	U	0.0682	2.07666
					42	U	0.0833	2.08465
					43	U	0.0283	1.47106
					44	C	0.0042	0.453992
					45	G	-0.0564	1.68447
					46	A	0.0737	2.25439
					47	U	0.0008	0.336528
					48	C	0.0501	2.1356
					49	U	-0.0133	0.961242
					50	C	0.0103	0.672398
					51	U	0.078	1.67457
					52	U	0.0063	0.522902
					53	G	0.0347	1.16004
					54	U	0.0023	0.389701
					55	A	0.0554	2.00774
					56	G	-0.0012	0.345399
					57	A	0.0194	1.10958
					58	U	-0.0214	1.22926
					59	C	-0.0608	1.80496
					60	U	0.002	0.378179
					61	G	0.233	2.67488
					62	U	0.146	2.50812
					63	U	0.0038	0.46746
					64	C	0.0311	1.26754
					65	U	-0.0207	1.07313
					66	C	-0.0022	0.381906
					67	U	0.0524	2.09838
					68	A	0.0496	1.99699
					69	A	0.0011	0.349333
					70	A	0.0579	2.03208
					71	C	-0.0057	0.483
					72	G	0.0563	1.91142
					73	A	0.004	0.616207
					74	A	0.0271	1.42919
					76	U	0.0973	1.9164
					77	U	0.0822	1.92786
					78	U	0.167	2.94857
					79	A	0.02	0.95843
					80	A	0.285	3.06639
					81	A	0.057	1.99344
					82	A	0.152	2.84233
					83	U	-0.0058	0.561179
					84	C	-0.0173	1.01336
					85	U	0.0034	0.414626
					86	G	0.0502	1.31191
					87	U	-0.0211	1.11445
					88	G	0.0152	0.995124
					89	U	0.0214	1.15155
					90	G	-0.0142	1.10054
					91	G	0.0009	0.316297
					92	C	-0.0166	0.711672
					93	U	0.0018	0.362267
					94	G	0.098	1.85659
					95	U	0.0108	0.704753
					96	C	-0.0446	1.82204
					97	A	0.191	2.95378
					98	C	-0.0068	0.497839
					99	U	0.0207	1.0704
					100	C	-0.0423	1.32849
					101	G	-0.0242	1.03388
					102	G	-0.0287	0.850662
					103	C	-0.0333	1.16356
					104	U	0.0279	1.49364
					105	G	-0.0087	0.542966
					106	C	-0.0379	1.11467
					107	G	0.0349	0.912964
					108	U	0.0047	0.511146
					109	G	-0.0118	0.567535
					110	C	-0.0068	0.433919
					111	U	0.0268	0.994896
					112	U	0.0045	0.438219
					113	A	0.0659	2.14152
					114	G	0.0741	1.40463
					115	U	0.0212	1.25622
					116	G	-0.0419	1.28947
					117	C	-0.0358	0.917824
					118	A	0.0427	1.76507
					119	C	0.0134	0.564784
					120	U	0.0283	1.32791
					121	C	-0.0566	1.82955
					122	A	0.172	2.88296
					123	C	-0.0068	0.441725
					124	G	-0.0187	0.687546
					125	C	-0.0071	0.487575
					126	A	-0.0036	0.429134
					127	G	-0.0492	1.19585
					128	U	0.0029	0.444802
					129	A	0.0876	2.76179
					130	U	0.0669	2.44686
					131	A	0.177	3.17032
					132	A	0.0112	0.687436
					133	U	0.151	2.6721
					134	U	0.0461	1.85391
					135	A	0.0385	1.81453
					136	A	0.331	3.61939
					137	U	0.0127	0.936942
					138	A	0.0161	1.20083
					139	A	0.0286	1.27651
					140	C	0.174	3.06974
					141	U	0.0768	2.31674
					142	A	0.068	2.38471
					143	A	0.145	3.20354
					144	U	0.137	3.03368
					145	U	0.165	3.18487
					146	A	0.109	2.66127
					147	C	-0.0009	0.338487
					148	U	0.0021	0.41289
					149	G	0.412	3.35095
					150	U	0.0513	1.85685
					151	C	-0.0593	1.8251
					152	G	-0.0449	1.34533
					153	U	0.0488	1.78876
					154	U	-0.0142	0.962637
					155	G	-0.0265	1.32587
					156	A	0.0195	1.13255
					157	C	-0.0415	1.09015
					158	A	0.0084	0.566406
					159	G	-0.0109	0.530169
					160	G	-0.0337	1.42512
					161	A	0.0038	0.456981
					162	C	0.0371	1.34107
					163	A	0.0103	0.776845
					164	C	-0.0252	0.716051
					165	G	-0.0251	0.925165
					166	A	0.0123	0.762775
					167	G	-0.0145	0.799195
					168	U	-0.0088	0.864656
					169	A	0.0341	2.2418
					170	A	0.0366	1.90552
					171	C	-0.0155	0.98578
					172	U	0.011	0.778178
					173	C	-0.0765	2.11781
					174	G	1.78	4.16522
					175	U	-0.0067	0.518302
					176	C	-0.0268	1.20917
					177	U	0.0064	0.690119
					178	A	0.0036	0.520972
					179	U	-0.0112	0.989304
					180	C	-0.0226	1.53422
					181	U	0.0159	0.905153
					182	U	-0.0094	0.677207
					183	C	-0.0137	0.803449
					184	U	0.0177	0.970951
					185	G	-0.0337	0.985643
					186	C	-0.104	1.7594
					187	A	0.126	2.32303
					188	G	-0.0258	1.04144
					189	G	-0.0602	1.60369
					190	C	-0.0286	1.34238
					191	U	-0.0081	0.631255
					192	G	-0.0621	1.46348
					193	C	0.0032	0.380186
					194	U	0.0246	1.21865
					195	U	0.0039	0.493712
					196	A	0.0011	0.353942
					197	C	0.0012	0.322268
					198	G	-0.0332	1.25369
					199	G	0.0125	0.608256
					200	U	0.0082	0.570943
					201	U	0.0282	1.41311
					202	U	0.0136	1.1391
					203	C	-0.0301	1.57595
					204	G	0.119	2.27775
					205	U	0.0585	1.79164
					206	C	-0.0507	1.46967
					207	C	-0.0814	1.68949
					208	G	0.0018	0.325823
					209	U	-0.0036	0.430927
					210	G	0.0141	0.636995
					211	U	0.0816	1.80358
					212	U	0.0211	1.14178
					213	G	0.029	0.960079
					214	C	-0.051	1.27194
					215	A	0.0057	0.49066
					217	C	-0.0646	1.28869
					218	C	-0.0224	1.07751
					219	G	-0.0624	1.77884
					220	A	0.163	2.84005
					221	U	-0.0341	1.24434
					222	C	0.0677	2.07043
					223	A	0.0279	1.47658
					224	U	0.0108	0.828928
					225	C	-0.0457	1.6087
					226	A	0.0012	0.337978
					227	G	-0.0151	0.608659
					228	C	0.007	0.464995
					229	A	0.0174	1.40016
					230	C	0.0003	0.320569
					231	A	0.0108	1.03384
					232	U	0.015	0.926557
					233	C	-0.0064	0.565885
					234	U	0.0121	0.813955
					235	A	0.0872	2.16958
					236	G	0.0047	0.463365
					237	G	-0.0074	0.558841
					238	U	0.011	0.789752
					239	U	0.0259	1.43985
					240	U	-0.0044	0.579099
					241	C	-0.0137	0.86513
					242	G	0.0726	1.76113
					243	U	0.0105	0.706821
					244	C	-0.0321	1.11234
					245	C	-0.023	0.755703
					246	G	0.0544	1.29996
					247	G	-0.0454	1.16328
					248	G	-0.0305	0.812563
					249	U	0.0066	0.598803
					250	G	-0.0428	1.4479
					251	U	0.0157	1.04852
					252	G	-0.0607	1.70326
					253	A	-0.013	0.664675
					254	C	-0.0161	0.600047
					255	C	0.0009	0.323044
					256	G	-0.0249	0.99314
					257	A	-0.0161	0.710228
					258	A	-0.0088	0.556483
					259	A	0.0176	0.902756
					260	G	-0.0266	1.17393
					261	G	-0.0222	1.02309
					262	U	-0.016	1.11589
					263	A	0.0344	1.38541
					264	A	-0.0519	1.35705
					265	G	-0.0078	0.596574
					266	A	0.0149	0.81102
					267	U	0.0179	0.936789
					268	G	-0.0034	0.417667
					269	G	-0.0532	1.4914
					270	A	0.0111	0.586237
					271	G	0.0162	0.828019
					272	A	-0.0109	0.676516
					273	G	-0.0297	1.18589
					274	C	-0.0283	0.819862
					275	C	-0.045	1.4661
					276	U	-0.044	1.10689
					277	U	-0.0046	0.457516
					278	G	0.0392	1.12459
					279	U	0.0205	0.877052
					280	C	-0.0601	1.57462
					281	C	-0.0071	0.47592
					282	C	-0.0415	1.05187
					283	U	-0.0192	0.692838
					284	G	0.0787	1.83765
					286	U	0.0619	1.62381
					287	U	0.145	2.73742
					288	U	0.058	2.01194
					289	C	-0.0078	0.513488
					290	A	-0.0132	0.723217
					291	A	0.0027	0.351835
					292	C	-0.0857	1.41055
					293	G	-0.0284	1.0207
					294	A	0.0149	0.772421
					295	G	0.0613	1.49344
					296	G	-0.0003	0.309193
					297	G	-0.0165	0.858675
					298	A	0.0395	1.64954
					299	G	-0.0096	0.489521
					300	U	-0.0327	1.23535
					301	C	0.0653	1.91195
					302	A	0.0432	1.79127
					303	A	0.0905	2.02758
					304	A	0.0054	0.405325
					305	G	0.0097	0.57821
					306	U	0.121	2.29657
					307	U	0.0325	1.46455
					308	C	-0.0392	1.26134
					309	U	0.241	3.01108
					310	G	0.176	2.28742
					311	U	0.0939	2.00563
					312	U	0.0867	2.30001
					313	U	-0.0035	0.512663
					314	G	0.0699	1.52365
					315	C	0.0037	0.359465
					316	C	-0.0343	1.23925
					317	C	-0.0673	1.25497
					318	U	-0.0356	1.11106
					319	G	-0.0444	1.44298
					320	A	0.144	2.60433
					321	U	0.117	2.49804
					322	C	-0.0133	0.660724
					323	U	-0.0012	0.333826
					324	G	0.0109	0.487425
					325	C	-0.0301	1.11056
					326	A	0.0296	1.63873
					327	U	0.0388	1.63131
					328	C	0.0357	1.16234
					329	G	0.0329	0.861047
					330	C	0.0843	1.43739
					331	U	0.0456	1.31383
					332	G	0.218	2.33594
					333	U	0.062	2.05992
					334	G	0.0089	0.680569
					335	G	-0.103	1.7405
					336	C	-0.0706	1.23842
					337	C	-0.0238	0.825815
					338	G	0.0178	0.728231
					339	A	0.0497	1.77804
					340	G	-0.028	0.972941
					341	G	-0.0472	1.03635
					342	C	0.0675	1.47661
					343	C	-0.0245	1.32501
					344	A	-0.0235	0.972785
					345	A	-0.0081	0.454468
					346	G	-0.0364	1.03708
					347	C	-0.0305	0.958353
					348	C	0.0082	0.66145
					349	C	-0.0218	1.18046
					350	A	0.0414	1.57422
					351	C	0.0251	0.685483
					352	C	-0.0856	1.5128
					353	G	-0.0595	1.51871
					354	A	0.239	2.91146
					355	G	-0.0225	0.935495
					356	A	0.0278	1.5308
					357	A	0.0482	1.78605
					358	C	0.0607	1.67444
					359	A	-0.0084	0.67267
					360	A	-0.0182	0.838055
					361	C	-0.0152	0.589689
					362	G	0.0393	1.44452
					363	A	0	0
					364	a	NA	NA
					365	g	NA	NA
					366	a	NA	NA
					367	c	NA	NA
					368	u	NA	NA
					369	u	NA	NA
					370	c	NA	NA
					371	a	NA	NA
					372	a	NA	NA
					373	c	NA	NA
					374	a	NA	NA
					375	u	NA	NA
					376	c	NA	NA
					377	g	NA	NA
					378	u	NA	NA
					379	g	NA	NA
					380	g	NA	NA
					381	c	NA	NA
					382	c	NA	NA
					383	g	NA	NA

## Sheet: Supplementary Fig. S3d
						ΔMutation rate
					concentration (mM)	C30-FAI		C30-FAI on average		FAI-N3		FAI-N3 on average
					0.02	0.8093	0.0109	0.001706	0.004374	0.0081	0.0041	-0.00852	0.003878
					0.1	2.185	0.0193	0.030173	0.00525001	0.0395	0.0051	-0.01139	0.004324
					1	2.092	0.03	0.134707	0.01676	0.8521	0.0262	0.26686	0.017872

[truncated: 14 more sheets: Supplementary Fig. S3e, Supplementary Fig. S4a, Supplementary Fig. S4b, Supplementary Fig. S5, Supplementary Fig. S6, Supplementary Fig. S7, Supplementary Fig. S8, Supplementary Fig. S9a, Supplementary Fig. S9b, Supplementary Fig. S9c, Supplementary Fig. S10a, Supplementary Fig. S10b, Supplementary Fig. S11a, Supplementary Fig. S11b]
